# Supplementary material for: High-performance triboelectric nanogenerators based on the organic semiconductor copper phthalocyanine
Source: Royal Society of Chemistry journal article supplement (doi:10.1039/d1nr03649a), 2021-01-01
Supplement: d1nr03649a1.pdf [file d1nr03649a1.pdf]

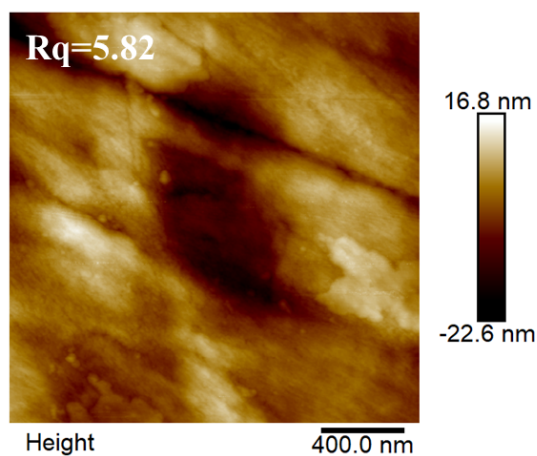

Fig.S1 AFM morphology of PET film

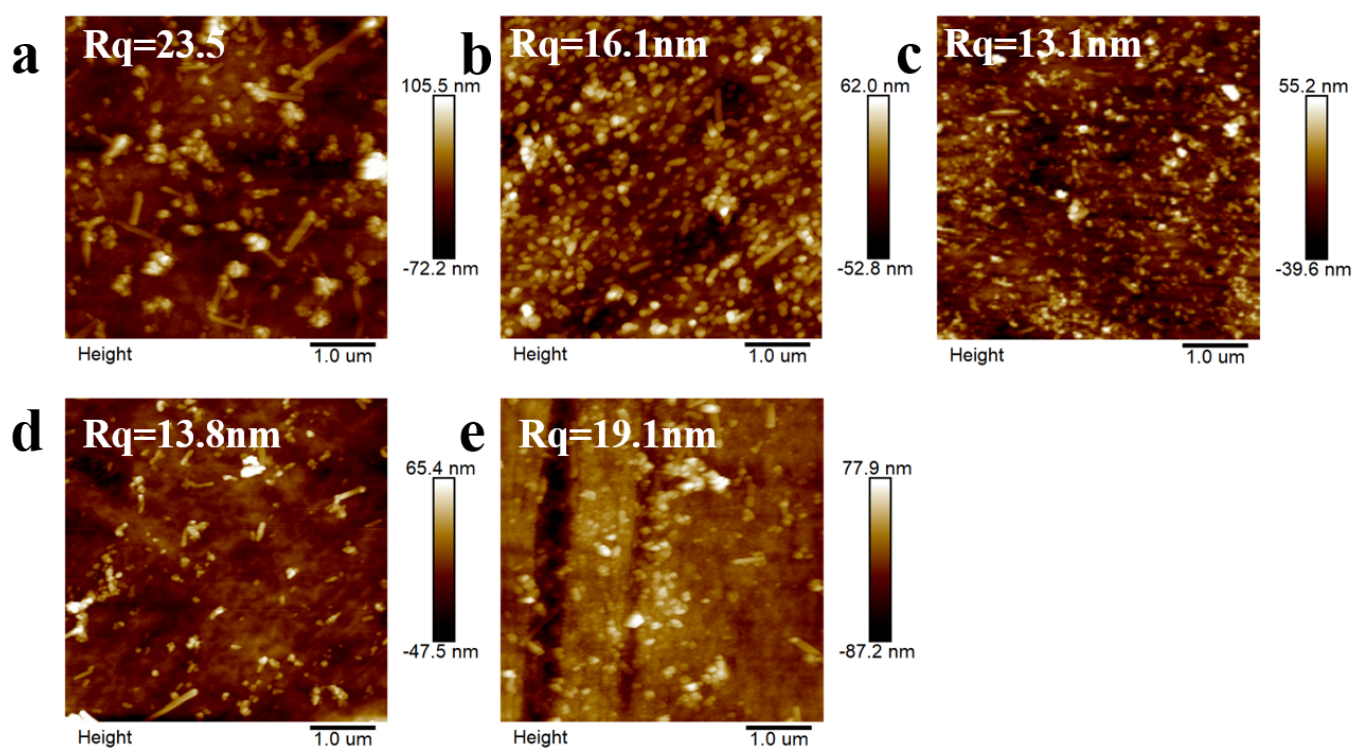

Fig.S2 AFM morphology of CuPc film and iodine doped CuPc films (a) CuPc, (b) CuPc doped with concentration of 5 wt% iodine, (c) CuPc doped with concentration of 10 wt% iodine, (d) CuPc doped with concentration of 15 wt% iodine, (e) CuPc doped with concentration of 20 wt% iodine

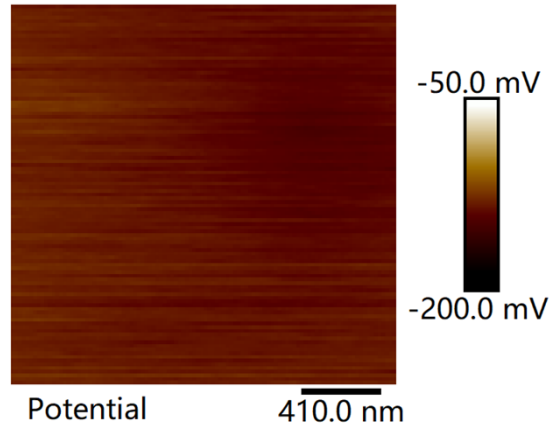

Fig.S3 KPFM surface potential distribution images of Al 8011 film

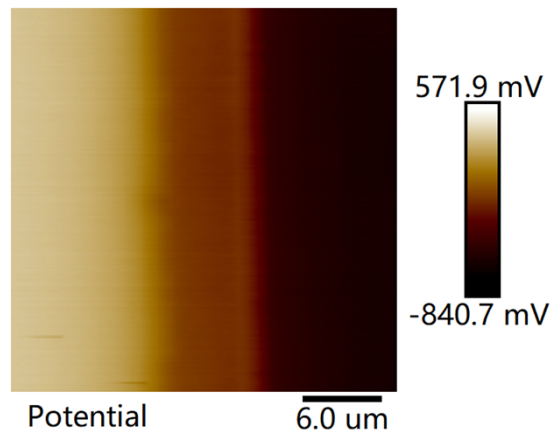

Fig.S4 KPFM surface potential distribution images of Au-Si-Al standard sample
